1 Allogeneic testes transplanted into partially castrated adult medaka (*Oryzias latipes*) can  
2 produce donor-derived offspring by natural mating over a prolonged period

3 Daichi Kayo<sup>1,2,\*</sup>, Shinji Kanda<sup>3</sup>, and Kataaki Okubo<sup>1</sup>

4

5 <sup>1</sup>, Department of Aquatic Bioscience, Graduate School of Agricultural and Life Science, The  
6 University of Tokyo, Bunkyo, Tokyo 113-8657, Japan; <sup>2</sup>, Present address: Laboratory of Molecular  
7 Ethology, Department of Integrative Life Sciences, Graduate School of Life Sciences, Tohoku  
8 University, Sendai, Miyagi 980-8577, Japan; <sup>3</sup>, Laboratory of Physiology, Atmosphere and Ocean  
9 Research Institute, The University of Tokyo, Kashiwa, Chiba 277-8564, Japan;

10 \*, corresponding author

11

12 Daichi Kayo: [daichi.kayo.b8@tohoku.ac.jp](mailto:daichi.kayo.b8@tohoku.ac.jp)

13 Shinji Kanda: [shinji@aori.u-tokyo.ac.jp](mailto:shinji@aori.u-tokyo.ac.jp)

14 Kataaki Okubo: [okubo@marine.fs.a.u-tokyo.ac.jp](mailto:okubo@marine.fs.a.u-tokyo.ac.jp)

15 **Abstract**

16 Generally, successful testis transplantation has been considered to require immune suppression in the  
17 recipient to avoid rejection of the transplanted tissue. In the present study, we demonstrate in medaka  
18 that allogeneic adult testicular tissue will engraft in adult recipients immediately after partial castration  
19 without the use of immunosuppressive drugs. The allografted testes are retained in the recipient's body  
20 for at least three months and are able to produce viable sperm that yield offspring after natural mating.  
21 Some recipients showed a high frequency (over 60%) of offspring derived from spermatozoa produced  
22 by the transplanted testicular tissue. Histological analyses showed that allografted testicular tissues  
23 included both germ cells and somatic cells that had established within an immunocompetent recipient  
24 testis. The relative simplicity of this testis transplantation approach will benefit investigations of the  
25 basic processes of reproductive immunology and will improve the technique of gonadal tissue  
26 transplantation.

27 **Keywords**

28 testis transplantation, reproductive immunology, surrogate broodstock, teleost, medaka

29 **Background**

30 Gonadal or germline transplantations have been used to investigations of reproductive

31 biology/immunology and have also been successfully applied for selective breeding in livestock and  
32 aquaculture, species conservation, and fertility treatment. A variety of allogeneic or xenogeneic  
33 transplantation protocols for gonadal tissues or germ cells have been developed and used to create  
34 potentially superior broodstocks, as insurance against the accidental death of vital broodstocks and for  
35 maintenance of threatened breeds and species (1-6). One of the major drawbacks of allogeneic  
36 transplantation of tissues, however, is the possibility of immunorejection of the donor cells and tissues.  
37 The use of spermatogonial stem cells (SSCs) for transplantation is considered particularly valuable as  
38 these cells are present in large numbers in the testes of adult males and are relatively easy to obtain (7,  
39 8). SSC transplantation studies in mice and rats have found that the donors and recipients need to be  
40 closely related to avoid a immunorejection; alternatively, immunodeficient animals can be used as  
41 recipients, or the recipients can be treated with immunosuppressant drugs (9, 10). In teleosts, the  
42 immunorejection problem can be avoided by transplanting germ cells into newly hatched recipient  
43 larvae whose immune systems are immature (11-14). However, this approach is technically demanding  
44 and requires the use of microinjection equipment.

45 Testis allografting is a possible alternative approach for germline transplantation, which can be easily  
46 performed, but the potential for immunorejection of donor cells and tissues remains with this method.

47 A few sites in the body display “immune privilege” in which an antigenic response is not elicited by  
48 the presence of transplanted cells. The testes are known to have immune privilege and are more likely  
49 to accept transplanted tissues (immune privilege site) and also to be the source of donor cells (immune  
50 privilege tissue) (15). A similar phenomenon may exist in fish because it has been reported in fish that  
51 transplants of body tissue (scales) are rejected within a few days to about two weeks, while  
52 subcutaneous transplants of testicular tissue are accepted for six to nine weeks (16-18).

53 The present study was initiated to develop a reliable method for allogeneic testis transplantation in  
54 fish. We chose the model fish species medaka (*Oryzias latipes*) for our analyses, as they spawn daily,  
55 are amenable to gene editing, and a surgical method for gonadectomy has been established (19, 20).  
56 We demonstrated the immunocompetency of the recipient medaka used in the present study by scale  
57 transplantation experiments. However, as described above, the testis is immune privileged and  
58 histological analyses of recipient testes after transplantation showed that they contained donor germ  
59 cells and somatic cells. These results indicate the feasibility of developing a reliable method for  
60 creating male surrogate parents to efficiently obtain donor-derived offspring.

61

## 62 **Materials and methods**

### 63 **Animals**

64 All medaka used in the study were maintained under a 14 hour light/ 10 hour dark photoperiod (light  
65 from 09:00 to 23:00), with a water temperature of 28°C. The fish were fed 3–4 times per day with live  
66 brine shrimp (*Artemia nauplii*) and a commercial pellet food (Otohime; Marubeni Nisshin Feed, Tokyo,  
67 Japan). We used d-rR/TOKYO (d-rR) strain medaka, along with transgenic strains, and captive-bred  
68 wild-type medaka. Transgenic medaka that express GFP under the neuropeptide B promoter (*npba*-  
69 GFP) were used (21). Transgenic medaka consistently expressing GFP (strain ID: TG862, d-rR-  
70 Tg(beta-actin-loxP-GFP); *actb*-GFP) were obtained from the National Institute for Basic Biology via  
71 The National BioResource Project-Medaka (NBRP-medaka). Please note that the d-rR strain is not an  
72 inbred strain. Thus, the *actb*-GFP medaka used as donor and recipient d-rR medaka are not isogenic  
73 with each other. Because *actb*-GFP strain females showed low fecundity, we generated the F1 hybrid  
74 (*actb*-GFP hetero) between *actb*-GFP strain males and recipient strain (d-rR) female, and *actb*-GFP  
75 hetero males were used as donor fish in some analyses. The ancestor of the wild-derived medaka was  
76 caught in an irrigation channel of a rice field (GPS coordinates: 32°58'21.9"N 132°58'12.6"E  
77 (32.972750, 132.970167); Isawa, Shimanto City, Kochi Prefecture). This wild-derived strain has been

78 bred and maintained for a number of generations in our laboratory.

## 79 **Testis transplantation into recipient males**

80 Medaka aged 3–8 months for each strain were used as donors; they were anesthetized, decapitated,  
81 and the testes were dissected. Isolated testes were kept in phosphate-buffered saline (PBS) until  
82 transplantation. Twenty-two recipient medaka (d-rR strain, aged 2–5 months) were anesthetized using  
83 0.02% MS-222 and their abdomens were incised using a razor blade. In male medaka, the testis is  
84 essentially a single organ following the fusion of bilateral testes during ontogeny (22). The rostral side  
85 of the recipient testis was pinched using forceps, and most of the testicular tissue was removed, leaving  
86 a part of the caudal side of testis using another set of forceps. The isolated donor testis was cut into 1–  
87 2 mm pieces which were placed adjacent to the remaining part of the recipient testis. After implantation,  
88 the abdominal incision was sutured with nylon thread. Post-surgical recovery was carried out by  
89 placing the recipient medaka in the 0.8% saline for two or three days; the fish were transferred to a  
90 freshwater environment after recovery. The abdomens of the recipient medaka and of their offspring  
91 were photographed using a stereomicroscope (M165FC or M205FA, Leica Microsystems, Wetzlar,  
92 Germany) equipped with a DFC7000T digital camera (Leica Microsystems). GFP fluorescence was  
93 detected using an excitation spectrum of 450–490 nm and emission spectrum of 500–550 nm.

94 **Scale transplantation experiments**

95 The immune responses of the fish strains used were confirmed by scale transplantation experiments;  
96 *actb*-GFP strain, *actb*-GFP hetero, and wild-derived strain (6–7 months old) were used as the donor  
97 strains, and d-rR strain medaka (6–7 months old) were used as the recipients. As a control, we  
98 transplanted scales between siblings of the d-rR strain (4–5 months old) that had been maintained for  
99 a number of generations in our laboratory and, essentially, has the same genetic background, to confirm  
100 that body tissue transplants were not rejected by the immune system of these fish.

101 Four recipient medaka were anesthetized using 0.02% MS-222. A few donor medaka were  
102 anesthetized and decapitated; 20–23 scales were removed from the donor body and transplanted into  
103 the caudal region around the lateral line of the four recipients (Day 0). The recipients were kept in a  
104 tank throughout the experimental period. The number of engrafted scales on the recipients was counted  
105 each day and the fish were photographed on Days 1, 7, and 10 under an M205FA stereo microscope  
106 equipped with a DFC7000T digital camera. Fluorescent staining was viewed after 450–490 nm and  
107 540–580 nm excitation and 500–550 nm 593–667 nm emission for GFP and Alizarin red S (ARS),  
108 respectively.

109 **Vital staining of scales**

110 In the control analysis using d-rR siblings, we stained the scales of donor fish with ARS (Wako,  
111 Osaka, Japan), a vital stain for fishbone (23), to distinguish them from the scales of the recipient.  
112 Medaka were anesthetized using 0.02% MS-222 and dried with tissue paper. A saturated solution of  
113 ARS (0.1% ARS in PBS) was dropped onto the fish body with a micropipette and left for 10–60  
114 seconds. Medaka with red scales were released into the tank and used as donors on the following day.  
115 Scale transplantation was performed as described above. The stained scales transplanted into recipients  
116 could generally be distinguished from the unstained scales of the recipient by eye for up to 5 days;  
117 after 6 days, it was necessary to use fluorescence to identify donor scales.

118 **Immunohistochemistry (IHC)**

119 The testis of *actb*-GFP hetero (age 4–5 months, n = 2), recipient strain (age 4–5 months, n = 2), and  
120 a recipient that had been transplanted with a testis from an *actb*-GFP strain (age 6–7 months) or *actb*-  
121 GFP hetero fish were excised (n = 3, 16 days or 2 months after surgery) and fixed in Bouin's fixative  
122 solution or 4% paraformaldehyde (PFA)/PBS. The fixed testis was dehydrated through an ethanol  
123 series, cleared with xylene, and embedded in paraffin. 10- $\mu$ m sections were cut and treated with 0.3%  
124 H<sub>2</sub>O<sub>2</sub> for 30 min, 2% normal goat serum (NGS) for 30 min, and incubated with anti-GFP rabbit



125 polyclonal antibody (#598, Medical and Biological Laboratories, Tokyo, Japan) diluted at 1:500–  
126 1:2000 in PBS containing 2% NGS overnight at 4°C. After two washes in PBS, the sections were  
127 incubated with biotinylated goat anti-rabbit IgG (diluted according to the manufacturer’s protocol) for  
128 1 hour and stained using the VECTASTAIN Elite ABC reagent (VECTASTAIN(R) Elite ABC-HRP  
129 Kit, Peroxidase, PK-6101; Vector Laboratories, Burlingame, CA) for 1 hour. The horseradish  
130 peroxidase-conjugated Avidin-Biotin Complex was visualized using TSA Plus Fluorescein System  
131 (PerkinElmer, Waltham, MA, USA) or 3,3-diaminobenzidine (DAB) and 0.003% H<sub>2</sub>O<sub>2</sub>. Cell nuclei  
132 were counterstained with 4',6-diamidino-2-phenylindole (DAPI) or hematoxylin. Fluorescent images  
133 were acquired by using a confocal laser scanning microscope (Leica TCS SP8; Leica Microsystems,  
134 Wetzlar, Germany). The following excitation and emission wavelengths, respectively, were used for  
135 detection: DAPI, 405 nm and 410–480 nm; fluorescein and Alexa Fluor 488, 488 nm and 495–545 nm.

### 136 **Dual labelling for GFP and mRNA of Sertoli/Leydig cell marker genes**

137 To examine the co-existence of GFP and Sertoli/Leydig cell marker genes, we performed dual  
138 labelling for IHC and *in situ* hybridization (ISH) analysis. The testis of a recipient that had been  
139 transplanted with a testis from an *actb*-GFP strain or *actb*-GFP hetero fish was excised, fixed in 4%  
140 PFA/PBS for 4–6 hours, and embedded in paraffin (n = 2, 16 days after surgery). 10-µm sections were

141 cut and hybridized with digoxigenin (DIG)-labeled RNA probe. The DNA fragments of *gsdf*  
142 (AB525390) as a Sertoli cell marker and *hsd3b* (AB525390) as a Leydig cell marker were used to  
143 generate DIG-labeled probes. The DIG-labeled *gsdf* probe was visualized by using an anti-DIG mouse  
144 primary antibody (Abcam, Cambridge, UK) and Alexa Fluor 555-conjugated goat anti-mouse IgG  
145 secondary antibody (Thermo Fisher Scientific, Waltham, MA, USA) while GFP was detected using an  
146 anti-GFP rabbit polyclonal antibody (Medical and Biological Laboratories), VECTASTAIN Elite ABC  
147 reagent (Vector laboratories), and TSA Plus Fluorescein System (PerkinElmer). The DIG-labeled  
148 *hsd3b* probe was visualized by using a horseradish peroxidase-conjugated anti-DIG antibody (Roche  
149 Diagnostics, Basel, Switzerland) and TSA Plus Cy3 System (PerkinElmer) while GFP was detected  
150 using an anti-GFP rabbit polyclonal primary antibody and an Alexa Fluor 488-conjugated goat anti-  
151 rabbit IgG secondary antibody (Thermo Fisher Scientific). Cell nuclei were counterstained with DAPI.  
152 Fluorescent images were acquired by using a confocal laser scanning microscope (Leica TCS SP8).  
153 The following excitation and emission wavelengths, respectively, were used for detection: DAPI, 405  
154 nm and 410–480 nm; fluorescein and Alexa Fluor 488, 488 nm and 495–545 nm; and Cy3 and Alexa  
155 Fluor 555, 552 nm and 562–700 nm.

156

157 **Results**

158 **Adult donor testis transplanted into an adult recipient male is functionally engrafted without**  
159 **immunosuppression**

160 We performed testis transplantation using *actb*-GFP donors and d-rR recipients. Four of the ten d-  
161 rR males whose testis was partially replaced with an *actb*-GFP testis showed strong green fluorescence  
162 in their abdomens at 2 months after surgery (Figure 1 a–c). Thus, successful allografts were present in  
163 four of the fish. To determine whether the engrafted testis was functional, we mated the GFP-positive  
164 recipients with d-rR females and assessed the frequency of GFP-positive eggs 2-7 weeks after surgery  
165 (Figure 1 d, e; Table 1). The frequency of GFP-positive eggs was approximately 9, 18, and 66% for  
166 three fish; the fourth fish produced no GFP positive eggs (Table 1). We also performed testis  
167 transplantation using donor *npba*-GFP medaka that were generated in our laboratory and had the same  
168 genetic background as the recipient fish (Table 1, #5 and #6). Two of the four recipients had high  
169 frequencies (95% and 100%, respectively) of GFP-positive eggs (Table 1). These results demonstrated  
170 that an adult testis allografted into an adult recipient male is functional.

171 **Functional allografts produced by transplanting testis from wild-derived medaka into d-rR**

172 **recipients**

173 To determine whether testis transplantation can be applied to genetically distant strains, we  
174 transplanted testes from wild-derived medaka into d-rR strain medaka males. The wild-derived  
175 medaka strain belongs to a different subclade than the d-rR strain due to geographical isolation (24)  
176 and has black pigmented scales. We also allografted testes from wild-derived strain donors to d-rR  
177 male recipients (Figure 2 a). Testicular tissues from wild-derived males were transplanted into eight  
178 d-rR males; the recipients were subsequently mated with d-rR females (Figure 2 a, b). Interestingly,  
179 black pigmented eggs, which indicate fertilization by sperm from the wild-derived donor testis, were  
180 produced by two of the eight recipients (Figure 2 c). All the fertilized eggs of one of these recipients  
181 (#7) were pigmented; the other produced 9% pigmented eggs (Table 2). These results showed that the  
182 testis transplantation was feasible even if the donor's genetic background was distant to the recipient  
183 (d-rR) strain.

184 **Transplanted scales are rejected by the immune system of the recipient**

185 We performed a scale transplantation experiment to confirm that d-rR recipients would reject somatic  
186 tissues from other strains (Figure 3 a–f, and Table 3). Loss of transplanted scales may be caused by  
187 immunorejection or mechanical injury; these two causes can be distinguished by the fact that

188 mechanical injury during the transplantation process results in the loss of the scales on the day after  
189 transplantation (18). Our analysis of the recipient fish on successive days after scale transplantation  
190 indicated that 10–15 scales derived from wild-derived and *actb*-GFP strain fish had been engrafted  
191 into recipients. Almost all the transplanted scales were rejected by days 7 to 9, and all scales were lost  
192 within 12 days. To confirm that the scale transplantation was successful, we performed vital staining  
193 of the scales with ARS in d-rR donors and transplanted these stained scales into d-rR recipients (Figure  
194 3 g, h). After the loss of some scales on Day 1 due to mechanical injury, most of the allografted d-rR  
195 scales had been accepted at 12 days by the d-rR recipient (Table 3). *actb*-GFP strain were generated  
196 from the d-rR strain, and therefore their genetic backgrounds should be the same. However, it should  
197 be noted that the d-rR strain is not an inbred strain. Based on the fact that transplanted *actb*-GFP scales  
198 were rejected by the recipient immune system, we conclude that the genetic backgrounds are  
199 sufficiently distant to cause immunorejection. Our results demonstrate that recipient d-rR strain  
200 medaka reject allografted tissues from donor medaka (*actb*-GFP strain and wild-derived strain).

### 201 **Allografted testes are functionally retained in recipients for more than 3 months**

202 To determine the functional longevity of donor-derived testis in recipient medaka, we mated  
203 recipients for up to 13 weeks after surgery (Table 4). One recipient (#2) was sacrificed for abdominal

204 analysis, and a second (#5) died accidentally; the other recipients were included in this analysis. As  
205 described in Table 4, four individuals (#3, #6, #7, and #8) showed almost equal frequencies of donor-  
206 derived eggs; two males did not produce any donor-derived offspring (Table 1); they are described as  
207 #1 or #4 in Table 4. This analysis demonstrated that allografted testis remained functional over an  
208 extended period of at least 13 weeks, except for one individual.

### 209 **Male germ cells and somatic cells derived from the donor testis engraft into recipient testis**

210 We performed an IHC analysis to detect GFP-expressing cells derived from the donor testis. GFP-  
211 positive cells (donor-derived cells) were distinguished as DAB-positive cells in histological sections,  
212 while GFP-negative cells (recipient cells) were only stained with hematoxylin (Figure 4 a–d). We used  
213 the *actb*-GFP strain and *actb*-GFP hetero medaka as donor males for the histological analysis. To  
214 confirm the immune rejection of the *actb*-GFP hetero donor in the recipient, we performed a scale  
215 transplantation analysis and demonstrated the immunocompetence to the donor scales in the recipient  
216 medaka (Table 5). All scales were rejected within 16 days.

217 For the classification of each developmental stage of spermatogenesis, we used the descriptions  
218 provided in previous studies (25, 26). GFP signals were detected in the allografted testis of the  
219 recipient male (Figure 4 a, b). The recipient testis contained spermatogonia with GFP signals,

220 indicating that these spermatogonial cells proliferated and supplied the donor-derived germ cells.  
221 These observations also indicate the reason why some recipients produced donor-derived offspring  
222 over a long period. Interestingly, testicular somatic cells, such as interstitial cells (IC), had allografted  
223 into the recipient testis (Figure 4c). In our observations, donor-derived germ cells were surrounded by  
224 donor-derived somatic cells, not by recipient-derived somatic cells. These observations suggest that  
225 the donor-derived testicular tissue probably included Sertoli cells and Leydig cells that were not  
226 immunorejected but integrated into the recipient testis and supported functional spermatogenesis.

227 To analyze the presence of donor-derived Sertoli cells and Leydig cells after testis grafting, we  
228 performed dual labelling IHC/ISH analysis using the anti-GFP antibody and probes against *gsdf* as a  
229 Sertoli cells marker (27) and *hsd3b* as a Leydig cells marker (28). The expression of both marker genes  
230 was detected in the GFP-positive (donor-derived) cells in the allografted testis in the recipient male  
231 (Figure 4 e, f). These observations showed that both Sertoli cells and Leydig cells derived from  
232 allografted testis exist in the recipient male. We could scarcely detect fluorescent GFP signal in the  
233 allografted germ cells (Figure 4 e, f). Similar to this, the GFP signal of the germ cells was relatively  
234 weak compared to that of surrounding somatic cells in *actb*-GFP hetero male testis (Supplementary  
235 Figure 1). However, it was obvious that donor-derived germ cells exist in the allografted testis because

236 we could get donor-derived offspring from recipient male (Figure 1 and 2). These results may suggest  
237 that the transcriptional activity of beta-actin is relatively low in germ cells.

238

## 239 **Discussion**

240 In the present study, we demonstrated that transplanted allogeneic testicular tissue could engraft in  
241 the body of recipient adult medaka without the use of an immunosuppressive treatment. Additionally,  
242 we showed that allografted testicular tissue derived from medaka with a different genetic background  
243 was functional and produced sperm that resulted in fertilized eggs after natural mating. A histological  
244 analysis also showed that both germ cells and testicular somatic cells were engrafted into allogeneic  
245 adult recipients.

246 As some recipients fertilized eggs with donor-derived sperm by natural mating (Tables 1, 2, and 4),  
247 the sperm derived from the donor testicular tissue must have been released to the efferent duct, which  
248 was re-established after the transplantation surgery. From our histological observation, it seems that  
249 the genetic origin of the efferent duct is likely to be both donor- (Figure 4 a) and recipient-derived  
250 (Figure 4 b). It is interesting that the allografted testicular tissue, which included somatic cells, was  
251 accepted by the immunocompetent recipient whose genetic background was distant to that of the donor



252 (Figure 2; Tables 2 and 4). In domesticated mammals, such as pigs and goats, it has been reported that  
253 allografted germ cells and Sertoli cells, successfully engraft in a recipient testis without the use of  
254 immunosuppressive treatment (3, 5). Our transplantation experiments here demonstrate that allogeneic  
255 transplantation of testicular tissue can succeed even in medaka with divergent genetic backgrounds.  
256 Examination of the geographic distribution of mitotypes of Japanese medaka (24) showed that the  
257 wild-derived medaka strain used as a donor in the present study belongs to subclade B-V, while the d-  
258 rR strain belongs to the subclade B-II; the divergence time among the B subclades is estimated as 0.5–  
259 2.3 mya. These results suggest the feasibility of the present method for testis allografting, at least in  
260 medaka. However, because our results were obtained from a relatively low number of fish, the  
261 generality of our approach should be carefully interpreted.

262 Generally, allografted tissue is rejected by the immune system of the recipient. A previous study of  
263 allogeneic scale transplantation in medaka confirmed this expectation, as the allografted scales were  
264 rejected within 7 days (18). We confirmed that the recipient strain used here was immunocompetent  
265 by allografting scales from a wild-derived strain (black scales) and the *actb*-GFP strain into recipient  
266 d-rR strain fish; scales derived from the genetically distant donor were rejected within 12 days (Figure  
267 3 and Table 3). Although the genetic backgrounds of the recipients (d-rR) and *actb*-GFP (generated

268 from d-rR strain) might be expected to be similar, these strains are not inbred and have different genetic  
269 backgrounds. These results show that testicular tissue can engraft in allogeneic individuals, whereas  
270 somatic tissue, such as scales, are rejected by the immune system. This finding is consistent with the  
271 general consensus that testes have immune privilege (15). In a previous study on rainbow trout, testis  
272 allografted into subcutaneous tissue was retained for 6-9 weeks but rejected after 9 weeks (16, 17). In  
273 the present study, testicular allografts inserted into the abdomen of the recipient were retained for the  
274 full duration of our-13 week studying (Table 4). These results indicate that allografted testicular tissue  
275 is more readily accepted by the recipient than other somatic donor tissues.

276 In the present study, histological analyses were performed to analyze the cellular structure of the  
277 testicular allograft (Figure 4). Our results revealed that the allografted testis was fused with the  
278 recipient-derived testis. Here, we demonstrated that the donor-derived germ cells were surrounded by  
279 donor-derived somatic cells but not recipient-derived cells. In medaka, we occasionally observe the  
280 functional regeneration of testis after partial castration. According to a previous study, testicular tissue  
281 can regenerate functionally after partial castration in rainbow trout (29). Given this report and our  
282 observation, it is possible that the remaining part of the recipient testis was fused with donor-derived  
283 testicular tissue during the regeneration process.

284 GFP signals were observed not only in the germ line cells but also in the testicular somatic cells,  
285 such as the Sertoli cells and interstitial cells, which include blood vessels and Leydig cells (Figure 4  
286 c) (30). Some of the testicular somatic cells (Sertoli and Leydig cells) are considered to play a role in  
287 immune tolerance in the testis. Sertoli cells create a local tolerogenic testicular environment in the  
288 testis by expressing immunoregulatory factors, such as serine protease inhibitor and clusterin, which  
289 down-regulate the signaling cascade under an antigen-antibody complex (31). Leydig cells, which  
290 produce sex steroid hormones in male testis, indirectly help the tolerogenic function of Sertoli cells  
291 by the actions of androgens (32, 33). Therefore, it is possible that donor-derived Sertoli and Leydig  
292 cells may assist allografted testis to evade the immunorejection by the recipient male. In contrast, an  
293 ovarian allografting study in rainbow trout demonstrated that allografted ovaries could not be accepted  
294 in other individuals (34). There might be also be a mechanism of immune tolerance that is regulated  
295 by these immune suppressive factors released from the testis in teleosts.

296 Methods for allogeneic or xenogeneic transplantation of SSCs, which are abundant in the testis,  
297 have been developed in many species. The methods for germ cell transplantation in teleosts can be  
298 classified into three approaches (35): primordial germ cell transplantation in fish embryos (36); germ  
299 cell transplantation in hatched fish larvae (12, 14, 37-39); and germ cell transplantation in adult fish

300 (40-45). The latter method, germ cell transplantation in adult fish, has potential advantages over the  
301 other two approaches for aquaculture and species preservation. For example, it avoids the time lag  
302 between transplantation and sexual maturity of the recipient. Moreover, it does not require  
303 sophisticated techniques and equipment for microinjection into eggs or larvae. Adult tissue  
304 transplantation is relatively easy as it involves a simple transplantation procedure through the genital  
305 duct of the recipient after germ cell extraction from the donor testis (44, 45). To improve the success  
306 rate of germ cell transplantation to allogeneic individuals, it is considered crucial that the germ cells  
307 of the recipient are depleted but that the ability of the recipient to nurse donor-derived germ cells is  
308 maintained (1, 46, 47), e.g. through use of triploid individuals (48) or *dead end* gene knockdown fish  
309 (49, 50). Cytotoxic drugs such as busulfan may be used for germ cell depletion; use of these drugs  
310 adds a relatively short time to recipient preparation (2–4 weeks) (40, 42, 43). However, the study using  
311 cytotoxic drug reported that the frequency of offspring derived from donor sperm generally does not  
312 exceed 40% (44). In the present study, the method for germ cell transplantation is completely different  
313 from these studies because the testicular tissue is also allografted with male germ cells. Some of the  
314 recipients that had received donor testicular tissue immediately after partial castration showed a high  
315 rate (60–100%) of offspring derived from donor spermatozoa (Tables 1 and 4). This may be due to co-  
316 engraftment of germ cells and somatic cells in the transplanted testicular tissue, and the donor-derived

317 testicular tissue may be able to nurse their own germ cells (Figure 4).

318 Cryopreservation methods for the whole testis have been developed in medaka (51). The combined  
319 use of testicular cryopreservation and the present approach for testicular tissue transplantation using  
320 adult recipients and natural mating may make it possible to shorten the time for recovery of larger  
321 numbers of offspring from cryopreserved testes compared to artificial insemination using  
322 cryopreserved sperm or injection of germ cells into larvae. In our IHC analysis, we observed GFP-  
323 positive spermatogonia (Figure 4 c). In medaka, it takes at least 5 days for spermatogonia to develop  
324 into spermatids and approximately one week for the spermatids to metamorphose into spermatozoa  
325 (52, 53). We mated each recipient used in the analysis here with three d-rR females for 2–3 weeks.  
326 Therefore, spermatogenesis in the donor-derived testis had sufficient time to complete at least one  
327 cycle of maturation before the mating analysis (Table 4). Our results suggest that the allografted germ  
328 cells proliferated in the recipient testis, allowing the recipient males to produce donor-derived  
329 offspring over a prolonged period (13–15 weeks). The rate of success for functional engraftment was  
330 approximately 30% in the present study; it will be necessary to improve this success rate to enable  
331 development of a simple, fast, and effective approach for testicular transplantation into adult recipient  
332 fish. It should also be noted that the present method requires the separation of donor-derived and

333 recipient-derived offspring.

334

## 335 **Conclusions**

336 We demonstrated the feasibility of allografting testicular tissue into immunocompetent recipients  
337 whose genetic background was distinctly different to those of the donors; functional engraftment was  
338 achieved after partial castration of the recipient without use of immunosuppressive treatments or  
339 chemical castration of the recipient. Further studies are required to improve our understanding of the  
340 immunological responses after testicular transplantation, and the results of these will be of value for  
341 aquaculture.

342

## 343 **Abbreviations**

344 ARS: Alizarin red S, DAB: 3,3-diaminobenzidine, DAPI: 4',6-diamidino-2-phenylindole, ed: efferent  
345 duct, DIG: digoxigenin, IC: interstitial cells, IHC: immunohistochemistry, ISH: *in situ*  
346 hybridization, MS-222: Ethyl 3-aminobenzoate methanesulfonic acid salt, NGS: normal goat

347 serum, PBS: phosphate-buffered saline, PFA: paraformaldehyde, sc: spermatocyte, sg:

348 spermatogonia, sp: spermatozoa, SSC: spermatogonial stem cells, st: spermatid

349

350 **Declaration of competing interest**

351 **Ethics approval and consent to participate**

352 All animal procedures were performed in accordance with the guidelines of the Institutional Animal

353 Care and Use Committee of the University of Tokyo. The committee requests the submission of an

354 animal-use protocol only for use of mammals, birds, and reptiles, in accordance with the Fundamental

355 Guidelines for Proper Conduct of Animal Experiment and Related Activities in Academic Research

356 Institutions under the jurisdiction of the Ministry of Education, Culture, Sports, Science and

357 Technology of Japan (Ministry of Education, Culture, Sports, Science and Technology, Notice No. 71;

358 June 1, 2006). Accordingly, we did not submit an animal-use protocol for this study, which used only

359 teleost fish and thus did not require approval by the committee.

360 **Consent for publication**

361 Not applicable

362 **Competing interests**

363 The authors declare no conflict of interest.

364 **Availability of data and materials**

365 All data generated or analyzed during this study are included in this published article.

366

367 **Funding**

368 This work was supported by Grants-in-Aid from Japan Society for the Promotion of Science (JSPS)

369 Grant 20K22587 to D.K. and NIBB Collaborative Research Program (22NIBB711) to D.K.

370

371 **Authors' contributions**

372 D.K. carried out all experimental work, designed the study, and drafted the manuscript; S.K. and K.O.

373 helped in the interpretation of the data and preparation the manuscript. All authors gave final approval

374 for publication.

375



376 **Acknowledgements**

377 We thank Masato Kinoshita, National Institute for Basic Biology, and the National BioResource  
378 Project (NBRP) Medaka for providing the transgenic medaka (strain ID: TG862) in this study. We also  
379 thank Thomas Fleming for language editing of the revised manuscript.

380

381 **Figure legends**

382 **Figure 1.**

383 **The appearance and functionality of testicular tissue allografted into the abdomen of a recipient.**

384 (a–c) Representative images of a recipient male that received testicular tissue derived from an *actb*-  
385 GFP strain male. Bright field image of the intact abdomen (a), bright field image of the incised  
386 abdomen (b), and fluorescence image of the incised abdomen (c); transplanted location is encircled by  
387 a dotted line in panel (b); scale bar, 1 mm. (d, e) Representative images of the eggs fertilized by the  
388 recipient male that had been transplanted with testicular tissue of an *actb*-GFP strain male. Bright field  
389 image (d) and fluorescence image (e); scale bar, 1 mm

390 **Figure 2.**

391 **Functional allografts of testicular tissue from donor medaka with a different genetic background**  
392 **to the recipients.**

393 (a) An outline of the surgical procedure used here. (b) An outline of the mating scheme used here. In  
394 medaka, females lay eggs after spawning and keep the eggs attached to their belly for a while.  
395 Pigmented eggs are produced following fertilization by spermatozoa of wild-derived strain germ cells.  
396 Non-pigmented eggs result from fertilization with d-rR strain sperm. (c) Representative image of eggs  
397 fertilized by a recipient that had been transplanted with testicular tissue from a wild-derived medaka  
398 strain; arrowhead, pigmented egg resulting from fertilization with a wild-derived spermatozoon; scale  
399 bar, 1 mm. The boxed area is magnified in panel (d).

400 **Figure 3.**

401 **Allografted scales were immunologically rejected by the recipient.**

402 Representative images of transplanted allogenic (a–f) or isogenic (g, h) scales into a recipient. (a, c,  
403 e). Representative bright field images of scales from a donor (*actb*-GFP strain and wild-derived strain)  
404 transplanted into a recipient (d-rR strain). Day 1 (a), Day 7 (c), Day 10 (e); arrowhead indicates  
405 transplanted scale. (b, d, f) Representative fluorescence images of scales transplanted into a recipient.

406 Day 1 (b), Day 7 (d), Day 10 (f); arrowhead indicates transplanted scale. Asterisk, autofluorescence  
407 originating from a scale on the recipient. (g, h) Representative images of a donor (d-rR strain) whose  
408 scales were vital stained with ARS and transplanted into a d-rR strain recipient: bright field image (g),  
409 and fluorescence image (h) on Day 10. Arrowhead, transplanted scale. Scale bar, 1 mm

410 **Figure 4.**

411 **Allografted testicular tissue, including somatic cells, was fused with the recipient testis.**

412 (a–d) Representative images of IHC analysis using an anti-GFP antibody visualized by DAB. Sections  
413 were counterstained by hematoxylin. DAB-positive cells are donor-derived (*actb*-GFP strain) cells.

414 (a) Representative image from IHC analysis of the recipient whose testis was mainly derived from  
415 allografted (donor-derived) testis. The *actb*-GFP strain was used as a donor male. ed, efferent duct.

416 Asterisks denote non-gonadal tissue of the recipient. Scale bar, 100  $\mu$ m. (b) Representative image from

417 IHC analysis of the recipient whose testis was partly derived from allografted testis. F1 hybrid of *actb*-

418 GFP strain and recipient strain (*actb*-GFP hetero) were used as a donor male. Scale bar, 100  $\mu$ m. The

419 boxed areas are magnified in panel (c): GFP-positive area (donor-derived tissue) and (d): GFP-

420 negative area (recipient-derived tissue). IC, interstitial cells; sg, spermatogonia; sc, spermatocyte; st,

421 spermatid; sp, spermatozoa. Scale bar, 50  $\mu$ m. (e, f) Identification of the presence of Sertoli or Leydig

422 cells in the allografted testis. The panels show the images of nuclear counterstaining (DAPI, blue), the  
423 cells of allografted testis (GFP, green), the expression of indicated marker genes ((e) *gsdf*, (f) *hsd3b*;  
424 magenta), and the merged image from the left in the same sections. Arrowheads denote representative  
425 cells that showed co-existence of the GFP and indicated marker genes. Scale bar, 50  $\mu$ m.

426

427 **Supplementary Figure 1.**

428 **The protein level of GFP in the germ cells is relatively low compared to that of the surrounding**  
429 **somatic cells.**

430 (a, b) Representative images from the IHC analysis using an anti-GFP antibody visualized by DAB  
431 staining (a) or fluorescent detection (b). (a) Left panel shows the image of the testis that consistently  
432 express GFP with beta-actin (*actb*-GFP hetero). Right panel shows the image of the testis of d-rR  
433 (recipient) strain. Scale bar, 100  $\mu$ m. (b) Upper and lower panels show the image of *actb*-GFP hetero  
434 and d-rR testis, respectively. Left and middle panels show images of DAPI (blue) and GFP (green),  
435 respectively, in the same section; right panel shows the merged image. The GFP signal in germ cells  
436 was faint in the fluorescent observation. Scale bar, 50  $\mu$ m.

437

438 **Tables**

439 **Table 1. Results of the mating analysis: surrogate father of d-rR strain allografted with *actb*-**  
 440 **GFP strain or *npba*-GFP strain testis.**

| After surgery (weeks) | 2 to 7 | 2 to 7 | 2 to 7 | 2 to 7 | 2     | 2 to 7 |
|-----------------------|--------|--------|--------|--------|-------|--------|
| Individual            | #1     | #2     | #3     | #4     | #5    | #6     |
| GFP +                 | 3      | 70     | 9      | 0      | 20    | 54     |
| GFP -                 | 30     | 36     | 40     | 78     | 1     | 0      |
| %                     | 9.09   | 66.04  | 18.37  | 0.00   | 95.24 | 100.00 |

441 GFP-positive eggs, which indicates fertilization by sperm from the allogenic or isogenic donor testis,  
 442 were produced by four of the ten (individuals #1~#4) or two of the four (individuals #5 and #6)  
 443 recipient males, respectively.

444

445

446 **Table 2. Results of the mating analysis: surrogate father of d-rR strain allografted with wild-**  
 447 **derived strain testis.**

| After surgery (weeks) | 6 to 9 | 6 to 9 |
|-----------------------|--------|--------|
| Individual            | #7     | #8     |
| Pigmented             | 150    | 10     |
| Non-pigmented         | 0      | 97     |
| %                     | 100.00 | 9.35   |

448 Black-pigmented eggs, which indicates fertilization by sperm from the wild-derived strain donor testis,  
 449 were produced by two of the eight recipient males (individuals #7 and #8).

450

451

452 **Table 3. Results of scale transplantation into a d-rR recipient**

453

|                                      |          | Day0 | Day1 | Day2 | Day3 | Day4 | Day5 | Day6 | Day7 | Day8 | Day9 | Day10 | Day12 | Day17 |
|--------------------------------------|----------|------|------|------|------|------|------|------|------|------|------|-------|-------|-------|
| <b>Pigmented scale</b>               | observed | 23   | 10   | 10   | 9    | 9    | 8    | 8    | 6    | 6    | 0    | -     | -     | -     |
|                                      | lost     |      | 13   | 0    | 1    | 0    | 1    | 0    | 2    | 0    | 6    | -     | -     | -     |
| <b>GFP scale</b>                     | observed | 23   | 15   | 15   | 15   | 10   | 7    | 4    | 3    | 2    | 1    | 1     | 0     | -     |
|                                      | lost     |      | 8    | 0    | 0    | 5    | 2    | 3    | 1    | 1    | 1    | 0     | 1     | -     |
| <b>Alizarin red S positive scale</b> | observed | 20   | 13   | 13   | 13   | 13   | 13   | 13   | 12   | 12   | 12   | 12    | 12    | 12    |
|                                      | lost     |      | 7    | 0    | 0    | 0    | 0    | 0    | 1    | 0    | 0    | 0     | 0     | 0     |

454

455

456 **Table 4. Results of the mating analysis at 13 weeks or more after surgery: surrogate father of d-**  
 457 **rR strain allografted with *actb*-GFP strain or wild-derived strain testis.**

458

|                             |           |           |       |        |        |       |
|-----------------------------|-----------|-----------|-------|--------|--------|-------|
| After surgery (weeks)       | 13        | 13        | 13    | 15     | 13     | 13    |
| Individual                  | #1 or #4* | #1 or #4* | #3    | #6     | #7     | #8    |
| GFP + or pigmented eggs     | 0         | 0         | 15    | 97     | 86     | 20    |
| GFP - or non-pigmented eggs | 94        | 17        | 69    | 0      | 0      | 106   |
| %                           | 0.00      | 0.00      | 17.86 | 100.00 | 100.00 | 15.87 |

459

460 Males of d-rR strain were used as recipients. The genetic backgrounds of donor testis were as follows;  
 461 #1~#4, *actb*-GFP; #6, *npba*-GFP; #7 and #8, wild-derived strain. \*, #1 or #4 could not be distinguished.

461

462

463 **Table 5. Results of *actb*-GFP medaka and *actb*-GFP hetero scale transplantation into a d-rR**  
 464 **recipient**

Donor: *actb*-GFP strain

|          | Day0 | Day1 | Day3 | Day6 | Day7 | Day8 |
|----------|------|------|------|------|------|------|
| observed | 20   | 20   | 20   | 7    | 2    | 0    |
| lost     |      | 0    | 0    | 13   | 5    | 2    |

Donor: *actb*-GFP hetero

|          | Day0 | Day1 | Day3 | Day6 | Day7 | Day8 | Day13 | Day16 |
|----------|------|------|------|------|------|------|-------|-------|
| observed | 20   | 12   | 12   | 12   | 12   | 12   | 1     | 0     |
| lost     |      | 8    | 0    | 0    | 0    | 0    | 11    | 1     |

465

466

## 467 **References**

- 468 1. Brinster RL, Avarbock MR. Germline transmission of donor haplotype following  
469 spermatogonial transplantation. *Proceedings of the National Academy of Sciences*.  
470 1994;91(24):11303-7.
- 471 2. Schlatt S, Foppiani L, Rolf C, Weinbauer G, Nieschlag E. Germ cell transplantation into X-  
472 irradiated monkey testes. *Human Reproduction*. 2002;17(1):55-62.
- 473 3. Honaramooz A, Megee SO, Dobrinski I. Germ cell transplantation in pigs. *Biology of*  
474 *Reproduction*. 2002;66(1):21-8.
- 475 4. Ryu B-Y, Orwig KE, Avarbock MR, Brinster RL. Stem cell and niche development in the  
476 postnatal rat testis. *Developmental Biology*. 2003;263(2):253-63.
- 477 5. Honaramooz A, Behboodi E, Megee SO, Overton SA, Galantino-Homer H, Echelard Y, et  
478 al. Fertility and germline transmission of donor haplotype following germ cell transplantation in  
479 immunocompetent goats. *Biology of Reproduction*. 2003;69(4):1260-4.
- 480 6. Kim Y, Selvaraj V, Dobrinski I, Lee H, McEntee MC, Travis AJ. Recipient preparation and  
481 mixed germ cell isolation for spermatogonial stem cell transplantation in domestic cats. *Journal of*  
482 *Andrology*. 2006;27(2):248-56.
- 483 7. Yoshizaki G, Fujinuma K, Iwasaki Y, Okutsu T, Shikina S, Yazawa R, et al. Spermatogonial  
484 transplantation in fish: a novel method for the preservation of genetic resources. *Comparative*  
485 *Biochemistry and Physiology Part D: Genomics and Proteomics*. 2011;6(1):55-61.
- 486 8. Ogawa T. Spermatogonial transplantation: the principle and possible applications. *Journal*  
487 *of Molecular Medicine*. 2001;79(7):368-74.
- 488 9. Zhang Z, Renfree MB, Short RV. Successful intra-and interspecific male germ cell  
489 transplantation in the rat. *Biology of Reproduction*. 2003;68(3):961-7.
- 490 10. Kanatsu-Shinohara M, Ogonuki N, Inoue K, Ogura A, Toyokuni S, Honjo T, et al.  
491 Allogeneic offspring produced by male germ line stem cell transplantation into infertile mouse testis.  
492 *Biology of Reproduction*. 2003;68(1):167-73.
- 493 11. Manning MJ, Nakanishi T. 4 - The specific immune system: Cellular defenses. In: Iwama G,

- 494 Nakanishi T, editors. Fish Physiology. 15: Academic Press; 1996. p. 159-205.
- 495 12. Octavera A, Yoshizaki G. Production of donor-derived offspring by allogeneic  
496 transplantation of spermatogonia in Chinese rosy bitterling. *Biology of Reproduction*.  
497 2019;100(4):1108-17.
- 498 13. Yoshizaki G, Yazawa R. Application of surrogate broodstock technology in aquaculture.  
499 *Fisheries Science*. 2019;85(3):429-37.
- 500 14. Duangkaew R, Kezuka F, Ichida K, Boonanuntasarn S, Yoshizaki G. Aging- and  
501 temperature-related activity of spermatogonial stem cells for germ cell transplantation in medaka.  
502 *Theriogenology*. 2020;155:213-21.
- 503 15. Streilein JW. Ocular immune privilege: therapeutic opportunities from an experiment of  
504 nature. *Nature Reviews Immunology*. 2003;3(11):879-89.
- 505 16. Hayashi M, Sakuma D, Yoshizaki G. Production of functional sperm by subcutaneous auto-  
506 grafting of immature testes in rainbow trout. *Molecular Reproduction and Development*.  
507 2018;85(2):155-62.
- 508 17. Yoshinaga TT, Kfoury Júnior JR, Butzge AJ, Olio RL, Hernandez-Blazquez FJ, Oliveira  
509 Carreira AC, et al. Testicular subcutaneous allografting followed by immunosuppressive treatment  
510 promotes maintenance of spermatogonial cells in rainbow trout (*Oncorhynchus mykiss*). *Fish &*  
511 *Shellfish Immunology*. 2021;112:108-15.
- 512 18. Matsuzaki T, Shima A. Number of major histocompatibility loci in inbred strains of the fish  
513 *Oryzias latipes*. *Immunogenetics*. 1989;30(3):226-8.
- 514 19. Kayo D, Zempo B, Tomihara S, Oka Y, Kanda S. Gene knockout analysis reveals essentiality  
515 of estrogen receptor  $\beta 1$  (Esr2a) for female reproduction in medaka. *Scientific Reports*. 2019;9(1):8868.
- 516 20. Kayo D, Oka Y, Kanda S. Examination of methods for manipulating serum 17 $\beta$ -Estradiol  
517 (E2) levels by analysis of blood E2 concentration in medaka (*Oryzias latipes*). *General and*  
518 *Comparative Endocrinology*. 2020;285:113272.
- 519 21. Hiraki-Kajiyama T, Yamashita J, Yokoyama K, Kikuchi Y, Nakajo M, Miyazoe D, et al.  
520 Neuropeptide B mediates female sexual receptivity in medaka fish, acting in a female-specific but  
521 reversible manner. *eLife*. 2019;8:e39495.
- 522 22. Kobayashi T, Matsuda M, Kajiura-Kobayashi H, Suzuki A, Saito N, Nakamoto M, et al. Two  
523 DM domain genes, DMY and DMRT1, involved in testicular differentiation and development in the  
524 medaka, *Oryzias latipes*. *Developmental Dynamics*. 2004;231(3):518-26.
- 525 23. Bensimon-Brito A, Carreira J, Dionísio G, Huysseune A, Cancela ML, Witten PE.  
526 Revisiting *in vivo* staining with alizarin red S - a valuable approach to analyse zebrafish skeletal



- 527 mineralization during development and regeneration. BMC Developmental Biology. 2016;16(1):2.
- 528 24. Takehana Y, Nagai N, Matsuda M, Tsuchiya K, Sakaizumi M. Geographic variation and  
529 diversity of the cytochrome b gene in Japanese wild populations of medaka, *Oryzias latipes*.  
530 Zoological Science. 2003;20(10):1279-91.
- 531 25. Grier H. Sperm development in the teleost *Oryzias latipes*. Cell and Tissue Research.  
532 1976;168(4):419-31.
- 533 26. Shimizu Y, Shibata N, Yamashita M. Spermiogenesis without preceding meiosis in the  
534 hybrid medaka between *Oryzias latipes* and *O. curvinotus*. Journal of Experimental Zoology.  
535 1997;279(1):102-12.
- 536 27. Shibata Y, Paul-Prasanth B, Suzuki A, Usami T, Nakamoto M, Matsuda M, et al. Expression  
537 of gonadal soma derived factor (GSDF) is spatially and temporally correlated with early testicular  
538 differentiation in medaka. Gene Expression Patterns. 2010;10(6):283-9.
- 539 28. Nakamoto M, Fukasawa M, Tanaka S, Shimamori K, Suzuki A, Matsuda M, et al.  
540 Expression of 3 $\beta$ -hydroxysteroid dehydrogenase (*hsd3b*), *star* and *ad4bp/sf-1* during gonadal  
541 development in medaka (*Oryzias latipes*). General and Comparative Endocrinology. 2012;176(2):222-  
542 30.
- 543 29. Kersten CA, Krisfalusi M, Parsons JE, Cloud JG. Gonadal regeneration in masculinized  
544 female or steroid-treated rainbow trout (*Oncorhynchus mykiss*). Journal of Experimental Zoology.  
545 2001;290(4):396-401.
- 546 30. Schulz R, Nóbrega R. The reproductive organs and processes | Anatomy and Histology of  
547 Fish Testis. 12011. p. 616-26.
- 548 31. Kaur G, Thompson LA, Dufour JM. Sertoli cells--immunological sentinels of  
549 spermatogenesis. Seminars in Cell & Developmental Biology. 2014;30:36-44.
- 550 32. Kaur G, Mital P, Dufour J. Testisimmune privilege-Assumptions versus facts. Animal  
551 Reproduction/Colegio Brasileiro de Reproducao Animal. 2013;10(1):3.
- 552 33. Meinhardt A, Hedger MP. Immunological, paracrine and endocrine aspects of testicular  
553 immune privilege. Molecular and Cellular Endocrinology. 2011;335(1):60-8.
- 554 34. Cloud JG. Surgical transplantation of sexually immature ovaries in rainbow trout  
555 (*Oncorhynchus mykiss*). Journal of Experimental Zoology Part A: Comparative Experimental Biology.  
556 2003;298A(1):73-6.
- 557 35. Lacerda S, Costa G, Campos-Junior P, Segatelli T, Yazawa R, Takeuchi Y, et al. Germ cell  
558 transplantation as a potential biotechnological approach to fish reproduction. Fish Physiology and  
559 Biochemistry. 2013;39(1):3-11.

- 560 36. Ciruna B, Weidinger G, Knaut H, Thisse B, Thisse C, Raz E, et al. Production of maternal-  
561 zygotic mutant zebrafish by germ-line replacement. *Proceedings of the National Academy of Sciences*.  
562 2002;99(23):14919-24.
- 563 37. Takeuchi Y, Yoshizaki G, Takeuchi T. Generation of live fry from intraperitoneally  
564 transplanted primordial germ cells in rainbow trout. *Biology of Reproduction*. 2003;69(4):1142-9.
- 565 38. Morita T, Kumakura N, Morishima K, Mitsuboshi T, Ishida M, Hara T, et al. Production of  
566 donor-derived offspring by allogeneic transplantation of spermatogonia in the yellowtail (*Seriola*  
567 *quinqueradiata*). *Biology of Reproduction*. 2012;86(6):176, 1-11.
- 568 39. Seki S, Kusano K, Lee S, Iwasaki Y, Yagisawa M, Ishida M, et al. Production of the medaka  
569 derived from vitrified whole testes by germ cell transplantation. *Scientific Reports*. 2017;7(1):1-11.
- 570 40. Majhi SK, Hattori RS, Rahman SM, Suzuki T, Strüssmann CA. Experimentally induced  
571 depletion of germ cells in sub-adult Patagonian pejerrey (*Odontesthes hatcheri*). *Theriogenology*.  
572 2009;71(7):1162-72.
- 573 41. Majhi SK, Hattori RS, Yokota M, Watanabe S, Strüssmann CA. Germ cell transplantation  
574 using sexually competent fish: an approach for rapid propagation of endangered and valuable  
575 germ lines. *PloS one*. 2009;4(7):e6132.
- 576 42. Lacerda SM, Batlouni SR, Costa GM, Segatelli TM, Quirino BR, Queiroz BM, et al. A new  
577 and fast technique to generate offspring after germ cells transplantation in adult fish: the Nile tilapia  
578 (*Oreochromis niloticus*) model. *PloS one*. 2010;5(5):e10740.
- 579 43. Nóbrega RH, Greebe CD, Van De Kant H, Bogerd J, De França LR, Schulz RW.  
580 Spermatogonial stem cell niche and spermatogonial stem cell transplantation in zebrafish. *PloS one*.  
581 2010;5(9):e12808.
- 582 44. Majhi SK, Hattori RS, Rahman SM, Strüssmann CA. Surrogate production of eggs and  
583 sperm by intrapapillary transplantation of germ cells in cytoablated adult fish. *PloS one*.  
584 2014;9(4):e95294.
- 585 45. Silva MA, Costa GMJ, Lacerda SMSN, Brandão-Dias PFP, Kalapothakis E, Silva Júnior AF,  
586 et al. Successful xenogeneic germ cell transplantation from Jundia catfish (*Rhamdia quelen*) into adult  
587 Nile tilapia (*Oreochromis niloticus*) testes. *General and Comparative Endocrinology*. 2016;230-  
588 231:48-56.
- 589 46. Ogawa T, Dobrinski I, Brinster R. Recipient preparation is critical for spermatogonial  
590 transplantation in the rat. *Tissue and Cell*. 1999;31(5):461-72.
- 591 47. Kanatsu-Shinohara M, Morimoto H, Shinohara T. Fertility of male germline stem cells  
592 following spermatogonial transplantation in infertile mouse models. *Biology of Reproduction*.

- 593 2016;94(5):112, 1-11.
- 594 48. Okutsu T, Shikina S, Kanno M, Takeuchi Y, Yoshizaki G. Production of trout offspring from  
595 triploid salmon parents. *Science* (New York, NY). 2007;317(5844):1517-.
- 596 49. Yoshizaki G, Takashiba K, Shimamori S, Fujinuma K, Shikina S, Okutsu T, et al. Production  
597 of germ cell-deficient salmonids by dead end gene knockdown, and their use as recipients for germ  
598 cell transplantation. *Molecular Reproduction and Development*. 2016;83(4):298-311.
- 599 50. Li Q, Fujii W, Naito K, Yoshizaki G. Application of dead end-knockout zebrafish as  
600 recipients of germ cell transplantation. *Molecular Reproduction and Development*. 2017;84(10):1100-  
601 11.
- 602 51. Kenji Murata MK, Kiyoshi Naruse. *Medaka: Biology, Management, and Experimental*  
603 *Protocols*. Hoboken, NJ, USA: Wiley & Sons Ltd.; 2019 2019/11/4. 368 p.
- 604 52. Michibata H. The role of spermatogonia in the recovery process from temporary sterility  
605 induced by gamma-ray irradiation in the teleost *Oryzias latipes*. *Journal of Radiation Research*.  
606 1976;17(3):142-53.
- 607 53. Saiki A, Tamura M, Matsumoto M, Katowgi J, Watanabe A, Onitake K. Establishment of *in*  
608 *vitro* spermatogenesis from spermatocytes in the medaka, *Oryzias latipes*. *Development, Growth &*  
609 *Differentiation*. 1997;39(3):337-44.
- 610

Figure 1

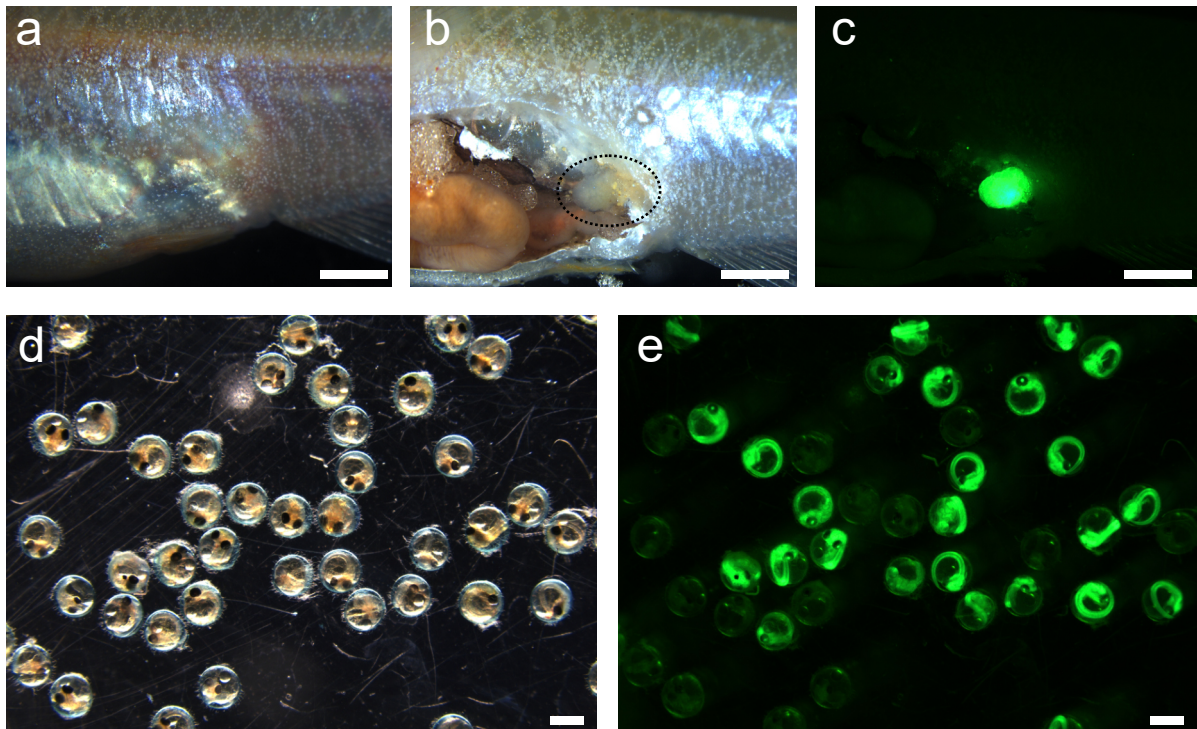

## Figure 2

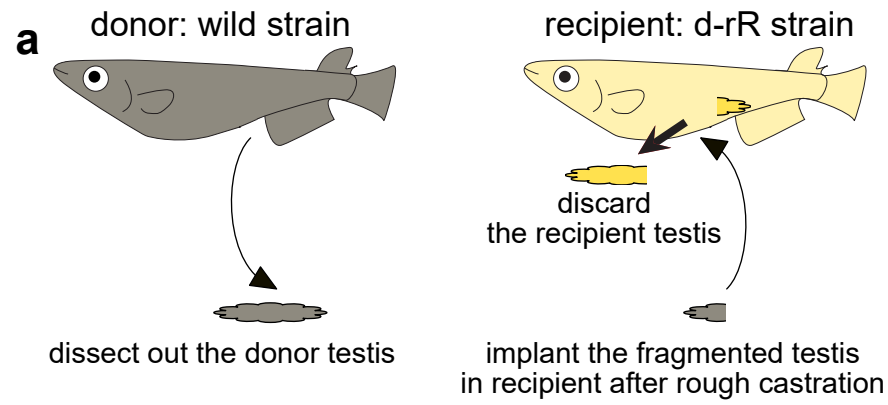

## **b** mating with d-rR female

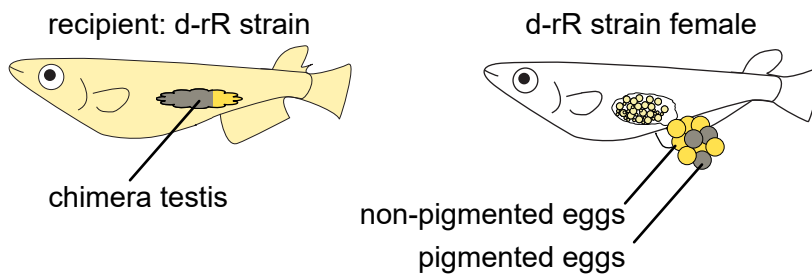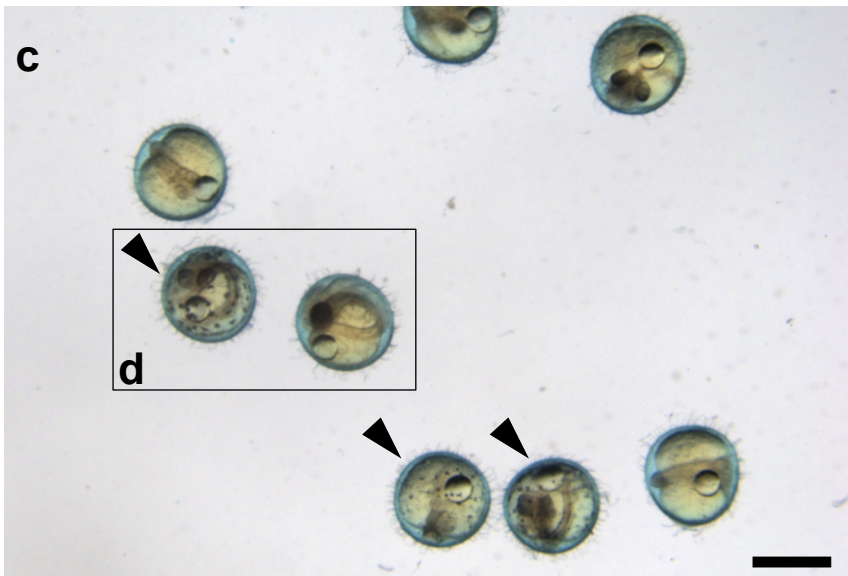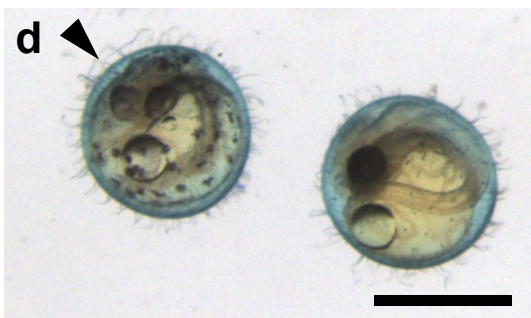

Figure 3

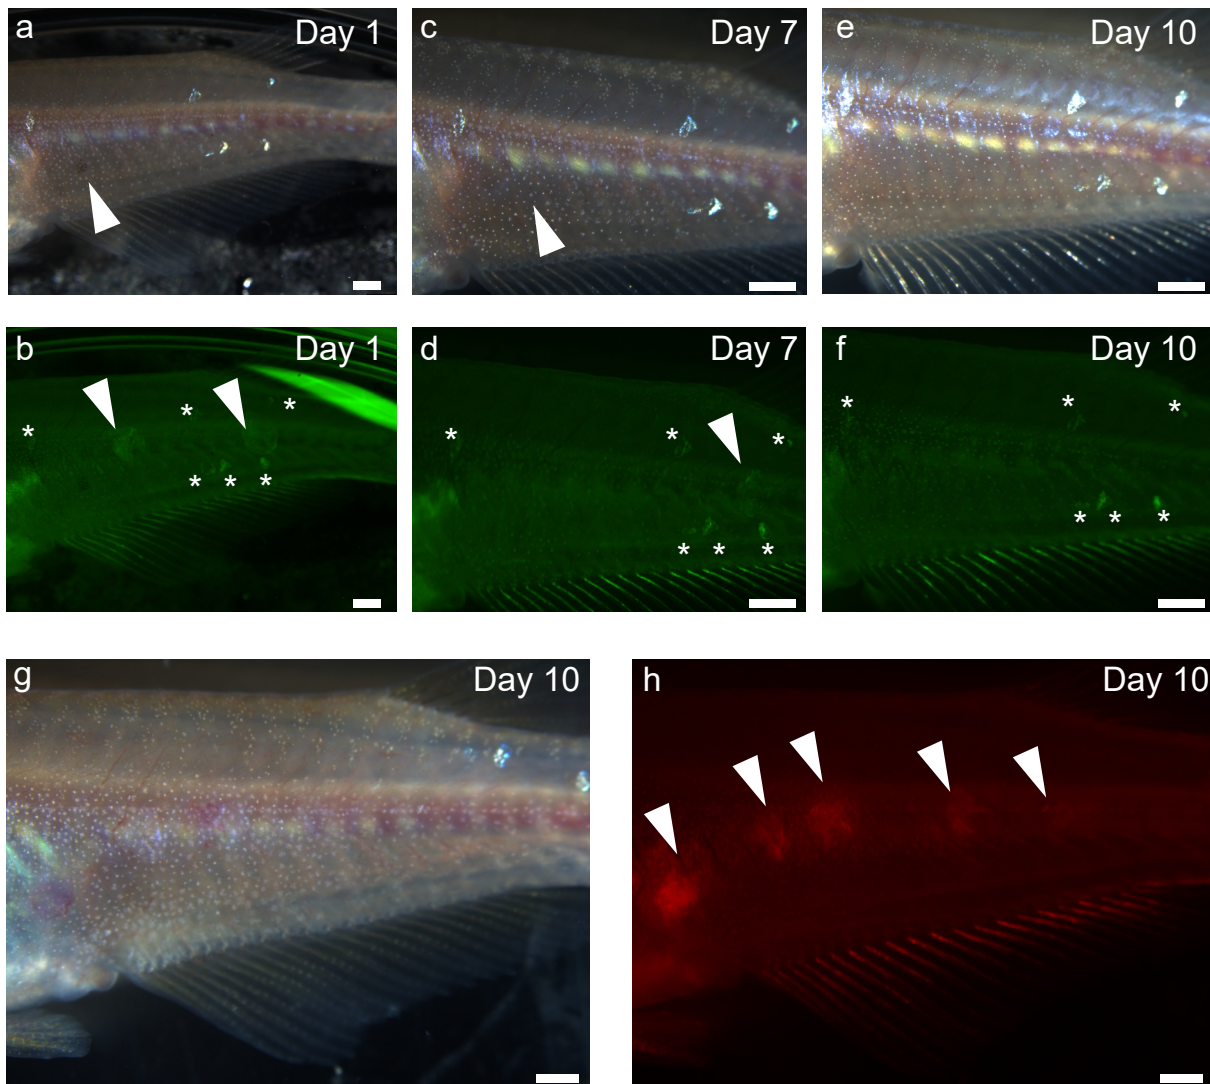

## Figure 4

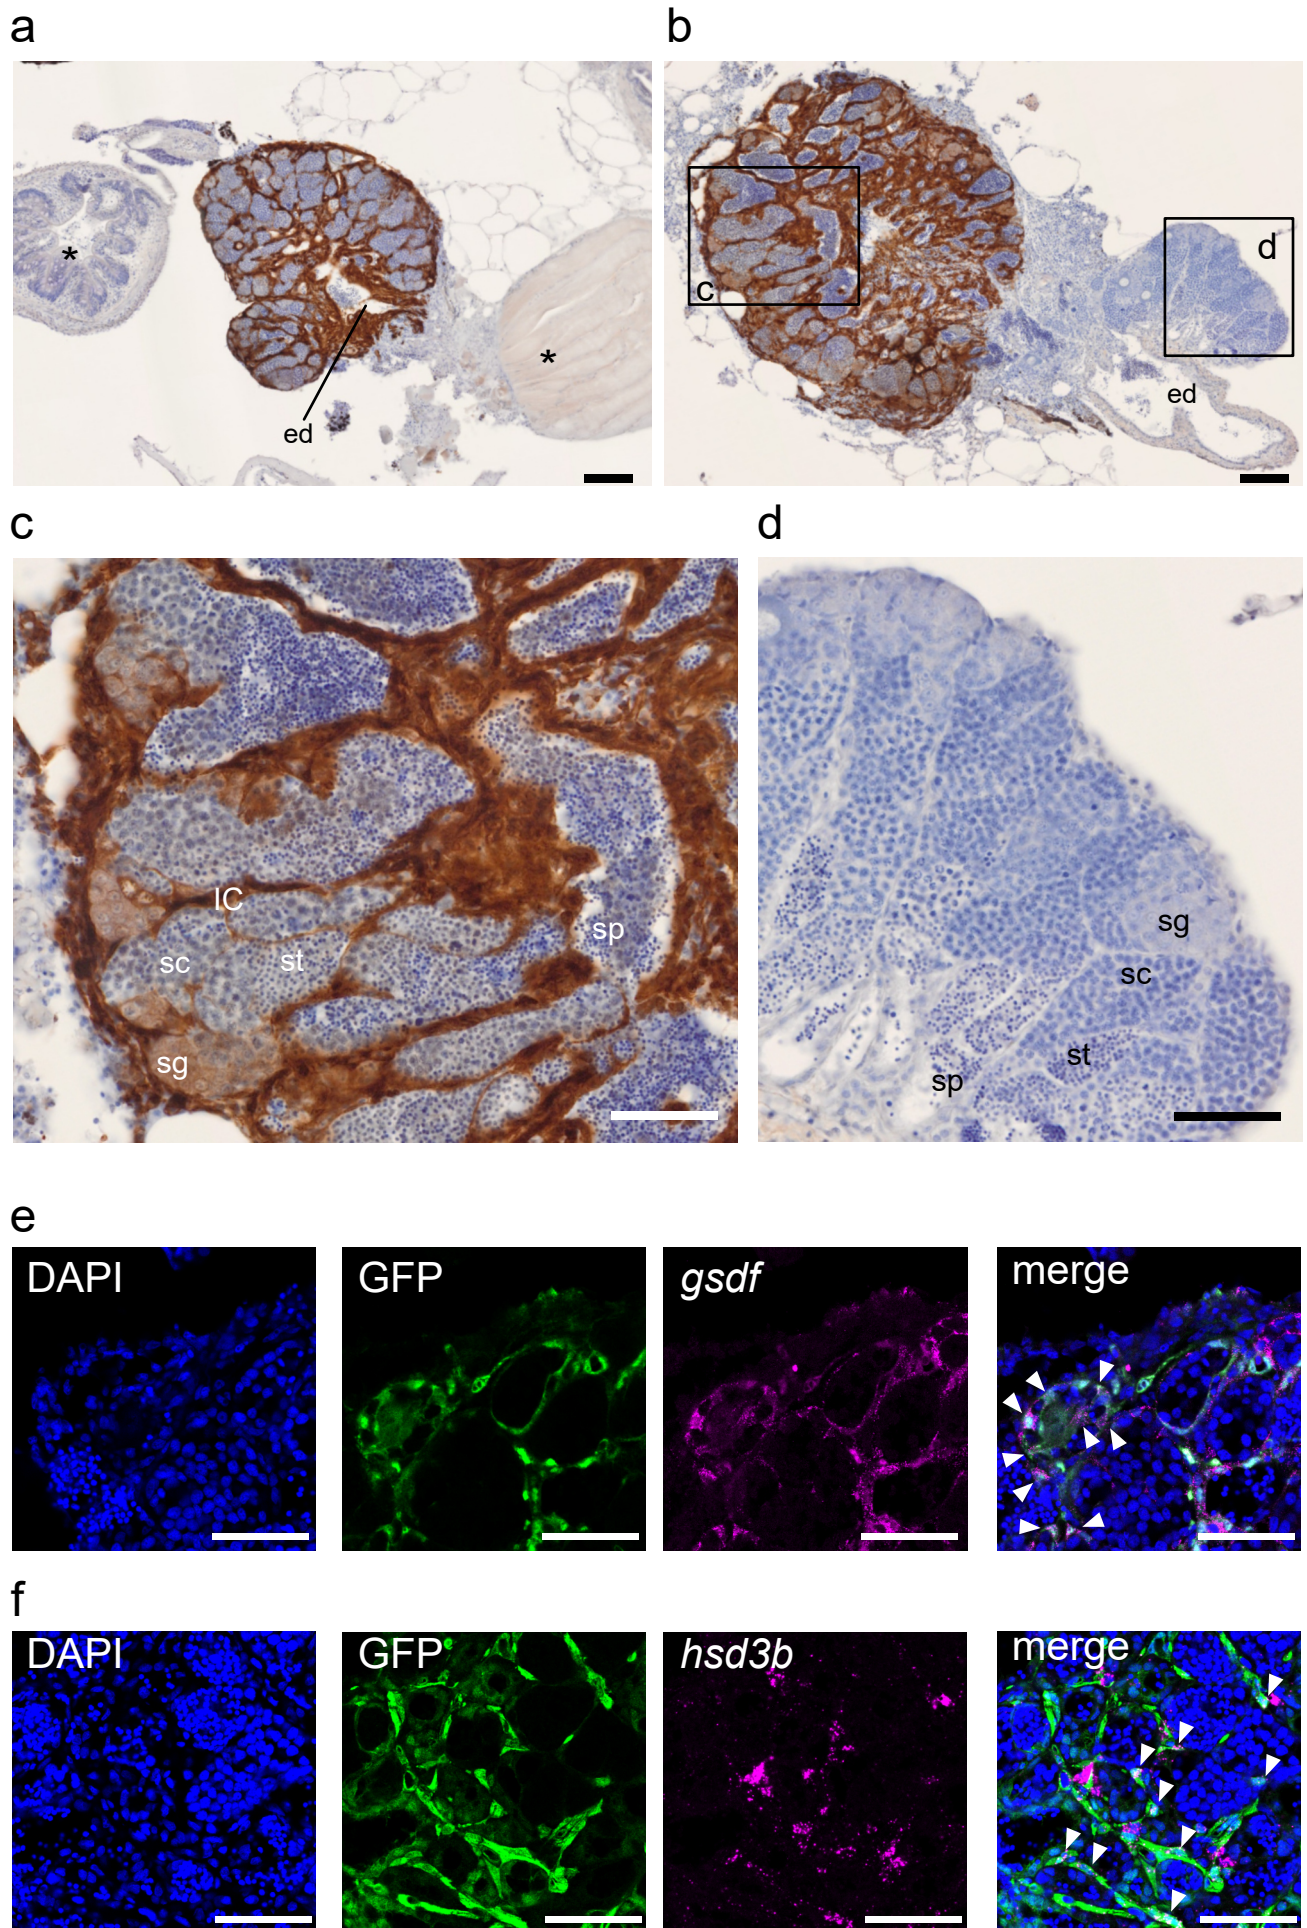

Source: https://www.biorxiv.org/content/10.1101/2022.05.07.490875v2.full.pdf
